# Supplementary material for: A Statistical Framework for Accurate Taxonomic Assignment of Metagenomic Sequencing Reads
Source: PLoS One. 2012 Oct 1;7(10):e46450. doi: 10.1371/journal.pone.0046450 (PMC3462201; doi:10.1371/journal.pone.0046450)
Supplement: Table S1 — Characteristics of data sets for simulation study 1. Number of reads generated from each organism is listed for the simLC, simMC, simHC, and simSC datasets. (XLS) [file pone.0046450.s006.xls]

## Sheet: Sheet1
simLC
Organisim	Reads (100bp)		Abundance
Escherichia coli str. K-12 substr. MG1655 chromosome	25926		10
Methanoculleus marisnigri JR1 chromosome	124074		90
Total	150000
simMC
Organisim	Reads (100bp)	Reads (400bp)	Abundance
Alcanivorax borkumensis SK2 chromosome	6888	458	25
Buchnera aphidicola str. APS (Acyrthosiphon pisum)	2944	201	50
Candidatus Blochmannia floridanus chromosome	1655	114	25
Escherichia coli str. K-12 substr. MG1655 chromosome	2131	133	5
Francisella tularensis subsp. tularensis SCHU S4	8587	573	50
Pasteurella multocida subsp. multocida str. Pm70	16854	1086	80
Pseudomonas entomophila L48 chromosome	13435	870	25
Pseudomonas fluorescens Pf0-1 chromosome	57867	3889	100
Shigella dysenteriae Sd197	39639	2676	100
Total	150000	10000
simHC
Organisim	Reads (100bp)	Reads (400bp)	Abundance
Agrobacterium tumefaciens str. C58 chromosome circular	9495	716	100
Anabaena variabilis ATCC 29413 chromosome	21851	80	100
Archaeoglobus fulgidus DSM 4304	7420	565	100
Bdellovibrio bacteriovorus HD100	12827	1051	100
Campylobacter jejuni subsp. jejuni 81-176	5422	397	100
Clostridium acetobutylicum ATCC 824	13594	1073	100
Lactococcus lactis subsp. cremoris SK11	8362	651	100
Nitrosomonas europaea ATCC 19718	9597	748	100
Pseudomonas aeruginosa PA7	22516	1735	100
Streptomyces coelicolor A3(2) chromosome	29746	2260	100
Sulfolobus tokodaii str. 7 chromosome	9170	724	100
Total	150000	10000
simSC
Organism	Reads (100bp)		Abundance
Acinetobacter_baumannii_ATCC_17978	1762		100
Actinobacillus_succinogenes_130Z	1050		100
Actinosynnema_mirum_DSM_43827	3778		100
Agrobacterium_tumefaciens_str._C58	1262		100
Alcanivorax_borkumensis_SK2	1432		100
Alkaliphilus_metalliredigens_QYMF	2284		100
Anabaena_variabilis_ATCC_29413	2910		100
Archaeoglobus_fulgidus_DSM_4304	1020		100
Azotobacter_vinelandii_AvOP	2525		100
Beijerinckia_indica_subsp._indica_ATCC_9039	1941		100
Bifidobacterium_dentium_Bd1	1255		100
Borrelia_burgdorferi_DN127	393		100
Brachyspira_murdochii_DSM_12563	1427		100
Bradyrhizobium_sp._ORS278	3424		100
Burkholderia_cenocepacia_J2315	1836		100
Burkholderia_pseudomallei_K96243	1829		100
Campylobacter_lari_RM2100	663		100
Candidatus_Blochmannia_floridanus	347		100
Candidatus_Cloacamonas_acidaminovorans	1076		100
Candidatus_Korarchaeum_cryptofilum_OPF8	766		100
Candidatus_Nitrospira_defluvii	2000		100
Candidatus_Protochlamydia_amoebophila_UWE25	1061		100
Candidatus_Vesicomyosocius_okutanii_HA	454		100
Caulobacter_crescentus_CB15	1861		100
Chlamydophila_pneumoniae_LPCoLN	535		100
Clostridium_acetobutylicum_ATCC_824	1791		100
Clostridium_botulinum_A_str._ATCC_3502	1802		100
Corynebacterium_glutamicum_ATCC_13032	1481		100
Cryptobacterium_curtum_DSM_15641	739		100
Deinococcus_geothermalis_DSM_11300	1172		100
Denitrovibrio_acetiphilus_DSM_12809	1410		100
Desulfococcus_oleovorans_Hxd3	1796		100
Dictyoglomus_turgidum_DSM_6724	875		100
Ehrlichia_ruminantium_str._Welgevonden	666		100
Escherichia_coli_str._K12_substr._MG1655	2198		100
Flavobacterium_johnsoniae_UW101	2805		100
Geobacillus_kaustophilus_HTA426	1640		100
Haemophilus parasuis SH0165	1160		100
Halobacterium_salinarum_R1	921		100
Halothermothrix_orenii_H_168	1191		100
Helicobacter pylori B38 chromosome	773		100
Helicobacter_pylori_26695	719		100
Herminiimonas_arsenicoxydans	1545		100
Herpetosiphon_aurantiacus_ATCC_23779	2839		100
Hyphomonas_neptunium_ATCC_15444	1745		100
Kineococcus_radiotolerans_SRS30216	2216		100
Kytococcus_sedentarius_DSM_20547	1269		100
Lactococcus_lactis_subsp._cremoris_SK11	1130		100
Listeria_monocytogenes_str._4b_F2365	1280		100
Macrococcus_caseolyticus_JCSC5402	950		100
Marinobacter_aquaeolei_VT8	2048		100
Methanocaldococcus_jannaschii_DSM_2661	776		100
Methanoculleus_marisnigri_JR1	1108		100
Methanopyrus_kandleri_AV19	724		100
Methanosarcina_mazei_Go1	1865		100
Methylococcus_capsulatus_str._Bath	1519		100
Nitrosomonas europaea ATCC 19718 chromosome	1290		100
Nitrosopumilus_maritimus_SCM1	759		100
Orientia tsutsugamushi str. Ikeda	946		100
Pasteurella multocida subsp. multocida str. Pm70 chromosome	1071		100
Pediococcus_pentosaceus_ATCC_25745	814		100
Pedobacter_heparinus_DSM_2366	2429		100
Polaromonas_naphthalenivorans_CJ2	1985		100
Prevotella_ruminicola_23	1656		100
Prochlorococcus_marinus_subsp._marinus_str._CCMP1375	852		100
Pseudomonas_aeruginosa_PA7	2981		100
Pseudomonas_putida_F1	2713		100
Psychromonas_ingrahamii_37	2097		100
Pyrococcus_horikoshii_OT3	769		100
Ralstonia_pickettii_12J	1726		100
Renibacterium_salmoninarum_ATCC_33209	1444		100
Rhodobacter_capsulatus_SB1003	1681		100
Rickettsia_felis_URRWXCal2	647		100
Salmonella_enterica_subsp._enterica_serovar_Newport_str._SL254	2234		100
Shewanella_frigidimarina_NCIMB_400	2283		100
Shigella boydii CDC 3083-94 chromosome	2085		100
Shigella dysenteriae Sd197	2012		100
Sinorhizobium meliloti 1021	1684		100
Sinorhizobium_medicae_WSM419	1702		100
Staphylococcus aureus subsp. aureus Mu50	1296		100
Staphylococcus epidermidis ATCC 12228	1306		100
Staphylococcus_aureus_subsp._aureus_NCTC_8325	1153		100
Stenotrophomonas_maltophilia_K279a	2207		100
Streptobacillus_moniliformis_DSM_12112	758		100
Streptococcus_pneumoniae_TIGR4	1022		100
Streptococcus_sanguinis_SK36	1100		100
Streptosporangium_roseum_DSM_43021	4730		100
Sulfolobus_islandicus_Y.N.15.51	1290		100
Sulfolobus_tokodaii_str._7	1226		100
Synechococcus_sp._CC9902	1007		100
Thermofilum_pendens_Hrk_5	869		100
Thermotoga_lettingae_TMO	1032		100
Thiobacillus_denitrificans_ATCC_25259	1287		100
Treponema_pallidum_subsp._pallidum_str._Nichols	531		100
Tsukamurella_paurometabola_DSM_20162	2035		100
Ureaplasma_parvum_serovar_3_str._ATCC_700970	380		100
Veillonella_parvula_DSM_2008	987		100
Wolbachia_endosymbiont_of_Drosophila_melanogaster	614		100
Xanthomonas_oryzae_pv._oryzicola_BLS256	2184		100
Yersinia_pestis_biovar_Microtus_str._91001	2082		100
Total	150000
